# Supplementary material for: Mechanistic study of aluminum alloy corrosion under the interaction of Embellisia sp. and Candida xyloterini
Source: Royal Society of Chemistry journal article supplement (doi:10.1039/d5ra02115d), 2025-01-01
Supplement: d5ra02115d2.pdf [file d5ra02115d2.pdf]

In the EIS and TAF data, 4 represents the *Embellisia* sp. system, 5 represents the *C. xyloterini* system, 45 is the mixed system, and Z represents the sterile system.
